# Supplementary material
Source: MDPI journal article supplement (https://www.mdpi.com/2624-5647/2/1/3)
Supplement: s1 [file s1]

# Supplementary Materials

**Table S1.** Anti-emetic effect. GCSI Score comparison among diabetic and idiopathic Gp patient in a recent NIH DiaComp funded study. The temporary GES was measured at 6 days and the permanent GES values at 6 months [4].

| Characteristics     | All DiaComp patients |            |            | Diabetic patients |           |            | Idiopathic patients |            |            |
|---------------------|----------------------|------------|------------|-------------------|-----------|------------|---------------------|------------|------------|
|                     | Baseline             | Temp       | Perm       | Baseline          | Temp      | Perm       | Baseline            | Temp       | Perm       |
|                     | Mean (SE)            | Mean (SE)  | Mean (SE)  | Mean (SE)         | Mean (SE) | Mean (SE)  | Mean (SE)           | Mean (SE)  | Mean (SE)  |
| GCSI                |                      |            |            |                   |           |            |                     |            |            |
| Nausea              | 3.5 (0.2)            | 1.7 (0.3)  | 2.6 (0.3)  | 3.3 (0.3)         | 1.8 (0.3) | 2.6 (0.4)  | 3.8 (0.4)           | 1.7 (0.4)  | 2.6 (0.4)  |
| Retching            | 2.4 (0.3)            | 0.8 (0.3)  | 1.5 (0.3)  | 2.6 (0.3)         | 1.1 (0.3) | 1.8 (0.4)  | 2.1 (0.4)           | 0.5 (0.4)  | 1.3 (0.4)  |
| Vomiting            | 2.4 (0.3)            | 0.6 (0.3)  | 1.8 (0.3)  | 2.4 (0.4)         | 0.9 (0.4) | 2 (0.4)    | 2.3 (0.4)           | 0.4 (0.4)  | 1.6 (0.4)  |
| Nausea subtotal     | 8.2 (0.7)            | 3.1 (0.7)  | 5.5 (0.8)  | 8.3 (0.8)         | 3.6 (0.9) | 6.3 (1)    | 8.1 (1)             | 2.5 (1)    | 4.8 (1.1)  |
| Stomach fullness    | 3.5 (0.2)            | 1.9 (0.2)  | 2.2 (0.3)  | 3.5 (0.3)         | 1.9 (0.3) | 2.4 (0.4)  | 3.6 (0.3)           | 1.9 (0.3)  | 2 (0.4)    |
| Finish meal         | 3.1 (0.3)            | 1.9 (0.3)  | 2.3 (0.3)  | 3.2 (0.3)         | 1.9 (0.4) | 2.5 (0.4)  | 3 (0.4)             | 1.9 (0.4)  | 2.1 (0.4)  |
| Full early          | 3.4 (0.3)            | 1.7 (0.3)  | 2.1 (0.3)  | 3.4 (0.3)         | 1.8 (0.3) | 2.8 (0.4)  | 3.4 (0.4)           | 1.6 (0.4)  | 1.5 (0.4)  |
| Appetite loss       | 3.5 (0.3)            | 1.7 (0.3)  | 1.8 (0.3)  | 3.5 (0.3)         | 1.6 (0.4) | 1.6 (0.4)  | 3.6 (0.4)           | 1.7 (0.4)  | 2 (0.4)    |
| Satiety subtotal    | 13.5 (0.8)           | 7.2 (0.9)  | 8.6 (1)    | 13.2 (1)          | 7.3 (1.1) | 9.3 (1.3)  | 13.8 (1.2)          | 7.2 (1.2)  | 7.8 (1.3)  |
| Bloating            | 3.7 (0.3)            | 1.8 (0.3)  | 3 (0.3)    | 3.4 (0.3)         | 1.9 (0.3) | 2.6 (0.4)  | 3.9 (0.4)           | 1.7 (0.4)  | 3.3 (0.4)  |
| Stomach size        | 3 (0.3)              | 1.4 (0.3)  | 2.3 (0.3)  | 2.7 (0.4)         | 1.6 (0.4) | 2.2 (0.5)  | 3.3 (0.4)           | 1.3 (0.4)  | 2.5 (0.5)  |
| Bloating subtotal   | 6.8 (0.5)            | 3.3 (0.6)  | 5.2 (0.6)  | 6.4 (0.7)         | 3.5 (0.7) | 4.9 (0.8)  | 7.3 (0.8)           | 3.1 (0.8)  | 5.6 (0.8)  |
| Total symptom score | 28.7 (1.6)           | 13.5 (1.6) | 19.6 (1.9) | 28.4 (2)          | 14.5 (2)  | 20.5 (2.5) | 29 (2.3)            | 12.6 (2.3) | 18.7 (2.5) |

**Table S2.** Antiarrhythmic effect. Changes in EGG and mEG parameters at baseline, temporary and permanent GES, stratified into diabetes and idiopathic Gp patients, in the NIH DiaComp study [4].

| Characteristics | All DiaComp patients |             |             | Diabetic patients |             |           | Idiopathic patients |             |             |
|-----------------|----------------------|-------------|-------------|-------------------|-------------|-----------|---------------------|-------------|-------------|
|                 | Baseline             | Temp        | Perm        | Baseline          | Temp        | Perm      | Baseline            | Temp        | Perm        |
|                 | Mean (SE)            | Mean (SE)   | Mean (SE)   | Mean (SE)         | Mean (SE)   | Mean (SE) | Mean (SE)           | Mean (SE)   | Mean (SE)   |
| EGG             |                      |             |             |                   |             |           |                     |             |             |
| Frequency       | 5.3 (0.2)            | 4.6 (0.2)   | 4.4 (0.2)   | 5.3 (0.2)         | 4.5 (0.2)   | 4.3 (0.3) | 5.4 (0.3)           | 4.6 (0.3)   | 4.4 (0.3)   |
| Amplitude       | 0.2 (0.1)            | 0.2 (0.1)   | 0.2 (0.1)   | 0.3 (0.1)         | 0.3 (0.1)   | 0.2 (0.1) | 0.1 (0.1)           | 0.1 (0.1)   | 0.1 (0.1)   |
| FAR             | 106 (11.7)           | 70.3 (11.7) | 74.4 (13.5) | 88.2 (14.2)       | 57.7 (14.8) | 74 (18.1) | 123.8 (17)          | 82.9 (16.6) | 74.8 (18.3) |
| PROP Score      | 0.8 (0.1)            | 1.1 (0.1)   | 1 (0.1)     | 0.9 (0.2)         | 1 (0.2)     | 0.9 (0.2) | 0.8 (0.2)           | 1.1 (0.2)   | 1.1 (0.2)   |
| mEG             |                      |             |             |                   |             |           |                     |             |             |
| Frequency       | 4.8 (0.2)            | 4 (0.2)     | 0 (0)       | 4.9 (0.3)         | 3.8 (0.3)   |           | 4.6 (0.3)           | 4.1 (0.3)   |             |
| Amplitude       | 1.2 (0.2)            | 1 (0.2)     | 0 (0)       | 1.2 (0.2)         | 1.1 (0.2)   |           | 1.1 (0.3)           | 0.9 (0.3)   |             |
| FAR             | 9.3 (3.6)            | 15.5 (3.8)  | 0 (0)       | 6.5 (4.2)         | 15.2 (4.6)  |           | 12.1 (5.1)          | 15.8 (5.6)  |             |
| prox_r          | 1 (0)                | 1 (0)       | 0 (0)       | 1 (0)             | 1 (0)       |           | 1 (0)               | 1 (0)       |             |
| prox_a          | 0.8 (0.1)            | 0.9 (0.1)   | 0 (0)       | 0.8 (0.1)         | 0.9 (0.1)   |           | 0.8 (0.1)           | 0.9 (0.1)   |             |
| prox_freq       | 4.9 (0.2)            | 4.4 (0.2)   | 0 (0)       | 5.1 (0.2)         | 4.3 (0.3)   |           | 4.6 (0.3)           | 4.5 (0.3)   |             |
| prox_amp        | 1.3 (0.1)            | 1.1 (0.2)   | 0 (0)       | 1.3 (0.2)         | 1.3 (0.2)   |           | 1.4 (0.2)           | 0.9 (0.2)   |             |
| prox_far        | 8.8 (4.6)            | 19.6 (5)    | 0 (0)       | 6.6 (5.5)         | 17.6 (6.3)  |           | 11.1 (6.6)          | 21.6 (7.3)  |             |

**Table S3.** Improvement in symptom scores, weights and BMI, route of nutrition and quality of life. Intermediate (1–2 year) and Long term (5 years) follow up data on 28 patients in long term GES study [22].

|                 | TSS   | WVFS      | Weight     | BMI      | NR                 | NQOL    | OQOL    |
|-----------------|-------|-----------|------------|----------|--------------------|---------|---------|
| Baseline        | 37.1  | 3.9 ± 0.1 | 69.9 ± 3.6 | 24.1 ± 1 | 8 po/2 po T/2 po H | —       | —       |
| 1 to 2 Years    | 15.75 | 1.4 ± 0.6 | 72.7 ± 6.4 | 25.6 ± 2 | 8 po/1 poT/1 po H  | —       | —       |
| 5 Years         | 20.3  | 1.7 ± 0.5 | 71.4 ± 5.9 | 24.6 ± 2 | 9 po/1 po T        | +2/+1.2 | +3/+2.1 |
| Improvement, %  | 51    | 61.6      | <5         | <5       | 30                 | Median/ | Median/ |
| p from baseline | <.05  | <.01      | .8         | .8       |                    | Mean    | Mean    |

WVFS, weekly vomiting frequency score; NR, Route of nutrition; NQOL, nutrition quality of life; OQOL, overall quality of life.

**Table S4.** Importance of Cajal/ICC counts in GES response. Comparison Between Pre-GES and Post-GES Treatment Outcomes in Terms of Gastric Emptying and Gastroparesis Symptom Score, grouped according to ICC counts [28].

| Groups                        | Variables                   | Pretreatment (Mean $\pm$ SD) | Posttreatment (Mean $\pm$ SD) | P       |
|-------------------------------|-----------------------------|------------------------------|-------------------------------|---------|
| Group A (ICC > 2.00) (N = 14) | Nausea                      | 2.70 $\pm$ 1.54              | 1.64 $\pm$ 1.55               | 0.022   |
|                               | Vomiting                    | 3.50 $\pm$ 0.76              | 1.43 $\pm$ 1.62               | < 0.001 |
|                               | Bloating                    | 3.18 $\pm$ 0.82              | 1.36 $\pm$ 1.39               | < 0.001 |
|                               | Abdominal pain              | 2.29 $\pm$ 1.33              | 1.39 $\pm$ 1.64               | 0.063   |
|                               | Total symptom               | 15.18 $\pm$ 3.26             | 7.36 $\pm$ 6.85               | 0.002   |
|                               | Gastric emptying test (1 h) | 75.47 $\pm$ 13.80            | 57.97 $\pm$ 21.34             | 0.035   |
|                               | Gastric emptying test (2 h) | 53.20 $\pm$ 20.54            | 45.28 $\pm$ 20.02             | 0.324   |
|                               | Gastric emptying test (4 h) | 22.62 $\pm$ 25.51            | 18.66 $\pm$ 13.88             | 0.607   |
|                               | Serosal frequency           | 3.96 $\pm$ 1.02              | 3.83 $\pm$ 1.36               | 0.789   |
|                               | Serosal amplitude           | 0.56 $\pm$ 0.46              | 0.37 $\pm$ 0.30               | 0.0592  |
|                               | Serosal ratio               | 17.89 $\pm$ 26.81            | 24.13 $\pm$ 33.22             | 0.582   |
| Group B (ICC < 2.00) (N = 9)  | Nausea                      | 3.5 $\pm$ 0.76               | 1.57 $\pm$ 1.43               | 0.022   |
|                               | Vomiting                    | 3.79 $\pm$ 0.39              | 2.14 $\pm$ 1.68               | 0.035   |
|                               | Bloating                    | 3.00 $\pm$ 1.00              | 2.00 $\pm$ 2.00               | 0.0863  |
|                               | Abdominal pain              | 3.71 $\pm$ 0.49              | 2.20 $\pm$ 1.82               | 0.075   |
|                               | Total symptom               | 16.43 $\pm$ 2.23             | 9.93 $\pm$ 7.68               | 0.047   |
|                               | Gastric emptying test (1 h) | 63.78 $\pm$ 26.01            | 68.86 $\pm$ 33.14             | 0.646   |
|                               | Gastric emptying test (2 h) | 41.22 $\pm$ 33.44            | 49.37 $\pm$ 34.21             | 0.343   |
|                               | Gastric emptying test (4 h) | 23.89 $\pm$ 34.10            | 30.82 $\pm$ 30.82             | 0.166   |
|                               | Serosal frequency           | 4.67 $\pm$ 1.57              | 4.23 $\pm$ 1.30               | 0.541   |
|                               | Serosal amplitude           | 0.18 $\pm$ 0.10              | 0.19 $\pm$ 0.13               | 0.791   |
|                               | Serosal ratio               | 45.12 $\pm$ 40.87            | 40.15 $\pm$ 28.21             | 0.767   |

GES indicates gastric electrical stimulation; ICC, interstitial cells of Cajal.

**Table S5.** Baseline and Permanent GES's Gastroparesis Symptom Scores in all Patients and those with Severe and Non-severe Pain [30].

| Symptoms                  | All Patients      |                               |                       | Severe Pain       |                               |                       | Nonsevere Pain    |                               |                       |
|---------------------------|-------------------|-------------------------------|-----------------------|-------------------|-------------------------------|-----------------------|-------------------|-------------------------------|-----------------------|
|                           | Baseline (n = 95) | During Permanent GES (n = 82) | P Value of Difference | Baseline (n = 68) | During Permanent GES (n = 58) | P Value of Difference | Baseline (n = 27) | During Permanent GES (n = 24) | P Value of Difference |
| Abdominal pain score (SD) | 2.95 (1.24)       | 2.10 (1.58)                   | < 0.001               | 3.62 (0.45)       | 2.30 (1.57)                   | < 0.001               | 1.26 (0.94)       | 1.60 (1.51)                   | 0.221                 |
| Early satiety score (SD)  | 2.99 (1.21)       | 1.94 (1.31)                   | < 0.001               | 3.10 (1.1)        | 2.02 (1.28)                   | < 0.001               | 2.72 (1.45)       | 1.74 (1.39)                   | 0.005                 |
| Distension score (SD)     | 2.85 (1.33)       | 2.25 (1.66)                   | < 0.001               | 3.15 (1.11)       | 2.43 (1.69)                   | 0.005                 | 2.11 (1.56)       | 1.81 (1.52)                   | 0.197                 |
| Nausea (SD)               | 3.42 (0.86)       | 2.42 (1.63)                   | < 0.001               | 3.44 (0.87)       | 2.64 (1.69)                   | < 0.001               | 3.35 (0.83)       | 1.88 (1.32)                   | < 0.001               |
| Vomiting (SD)             | 2.43 (1.38)       | 1.60 (1.63)                   | < 0.001               | 2.54 (1.33)       | 1.84 (1.69)                   | 0.001                 | 2.13 (1.48)       | 0.98 (1.29)                   | 0.001                 |
| Total symptom score       | 14.63 (3.46)      | 10.13 (6.02)                  | < 0.001               | 16.04 (2.75)      | 11.1 (6.03)                   | < 0.001               | 11.63 (3.28)      | 7.80 (5.27)                   | 0.003                 |

GES, gastric electrical stimulation; SD, standard deviation.
